# Supplementary material for: CD24 signalling through macrophage Siglec-10 is a target for cancer immunotherapy
Source: Springer Nature journal article supplement (doi:10.1038/s41586-019-1456-0), 2019-07-31
Supplement: 41586_2019_1456_MOESM1_ESM.pdf [file 41586_2019_1456_MOESM1_ESM.pdf]

In the format provided by the authors and unedited.

# CD24 signalling through macrophage Siglec-10 is a target for cancer immunotherapy

Amira A. Barkal<sup>1,2,3,4</sup>, Rachel E. Brewer<sup>1,2,3</sup>, Maxim Markovic<sup>1,2,3</sup>, Mark Kowarsky<sup>5</sup>, Sammy A. Barkal<sup>1</sup>, Balyn W. Zaro<sup>1,2,3</sup>, Venkatesh Krishnan<sup>6</sup>, Jason Hatakeyama<sup>1,7</sup>, Oliver Dorigo<sup>6</sup>, Layla J. Barkal<sup>8</sup> & Irving L. Weissman<sup>1,2,3,9\*</sup>

<sup>1</sup>Institute for Stem Cell Biology and Regenerative Medicine, Stanford University School of Medicine, Stanford, CA, USA. <sup>2</sup>Ludwig Center for Cancer Stem Cell Research and Medicine, Stanford University School of Medicine, Stanford, CA, USA. <sup>3</sup>Stanford Cancer Institute, Stanford University School of Medicine, Stanford, CA, USA. <sup>4</sup>Stanford Medical Scientist Training Program, Stanford University, Stanford, CA, USA. <sup>5</sup>Department of Physics, Stanford University, Stanford, CA, USA. <sup>6</sup>Department of Obstetrics and Gynecology, Division of Gynecologic Oncology, Stanford University School of Medicine, Stanford, CA, USA. <sup>7</sup>Department of Urology, Stanford University School of Medicine, Stanford, CA, USA. <sup>8</sup>Department of Medicine, Stanford University School of Medicine, Stanford, CA, USA. <sup>9</sup>Department of Pathology, Stanford University School of Medicine, Stanford, CA, USA. \*e-mail: [irv@stanford.edu](mailto:irv@stanford.edu)

**Supplementary Table 1.** Data table including abbreviated names, full names, and tumor vs. healthy *n* for TCGA, TARGET, and GTEX studies analyzed for this work

| <b>TCGA Study Abbreviation</b> | <b>TCGA or TARGET Study Name</b>                       | <b>GTEX Study Name(s)</b>           | <b>Patient tumors analyzed (n)</b> | <b>Healthy samples analyzed (n)</b> |
|--------------------------------|--------------------------------------------------------|-------------------------------------|------------------------------------|-------------------------------------|
| OV                             | Ovarian serous cystadenocarcinoma                      | Ovary                               | 419                                | 88                                  |
| CHOL                           | Cholangiocarcinoma                                     | N/A (only TCGA normal)              | 36                                 | 9                                   |
| TGCT                           | Testicular germ cell tumors                            | Testis                              | 148                                | 165                                 |
| LGG                            | Lower grade glioma                                     | Brain - cortex                      | 509                                | 105                                 |
| BRCA                           | Breast invasive carcinoma                              | Breast                              | 1092                               | 292                                 |
| CESC                           | Cervical squamous cell and endocervical adenocarcinoma | Endocervix, Ectocervix              | 304                                | 13                                  |
| UCEC                           | Uterine corpus endometrial carcinoma                   | N/A (only TCGA normal)              | 180                                | 23                                  |
| ALL                            | Acute lymphoblastic leukemia (peripheral blood)        | Whole blood                         | 37                                 | 337                                 |
| BLCA                           | Bladder urothelial carcinoma                           | Bladder                             | 407                                | 28                                  |
| STAD                           | Stomach adenocarcinoma                                 | Stomach                             | 414                                | 211                                 |
| GBM                            | Glioblastoma multiforme                                | Brain - cortex                      | 153                                | 110                                 |
| LIHC                           | Liver hepatocellular carcinoma                         | Liver                               | 369                                | 160                                 |
| PRAD                           | Prostate adenocarcinoma                                | Prostate                            | 495                                | 152                                 |
| LUSC                           | Lung squamous cell carcinoma                           | Lung                                | 498                                | 50                                  |
| LUAD                           | Lung adenocarcinoma                                    | Lung                                | 513                                | 59                                  |
| KIRP                           | Kidney renal papillary cell carcinoma                  | Kidney                              | 288                                | 32                                  |
| CCSK                           | Clear cell sarcoma of the kidney (TARGET)              | Kidney                              | 13                                 | 28                                  |
| THCA                           | Thyroid carcinoma                                      | Thyroid                             | 504                                | 338                                 |
| KIRC                           | Kidney renal clear cell carcinoma (TCGA)               | Kidney                              | 530                                | 72                                  |
| ESCA                           | Esophageal carcinoma                                   | Esophagus                           | 181                                | 13                                  |
| READ                           | Rectum adenocarcinoma                                  | N/A (only TCGA normal)              | 92                                 | 11                                  |
| DLBCL                          | Diffuse large B cell lymphoma                          | Whole blood                         | 48                                 | 337                                 |
| COAD                           | Colon adenocarcinoma                                   | Colon - sigmoid, Colon - transverse | 288                                | 41                                  |
| PAAD                           | Pancreatic adenocarcinoma                              | Pancreas                            | 178                                | 171                                 |
| KICH                           | Kidney chromophobe                                     | Kidney                              | 66                                 | 25                                  |
| HNSC                           | Head and neck squamous cell carcinoma                  | N/A (only TCGA normal)              | 518                                | 44                                  |
| ACC                            | Adrenocortical carcinoma                               | Adrenal gland                       | 77                                 | 128                                 |
| AML                            | Acute Myeloid Leukemia                                 | Whole blood                         | 200                                | 337                                 |

**Supplementary Table 2.** Data table including clone, use, and supplier for all antibodies used in this work

| <b>Antibody</b>            | <b>Clone</b>           | <b>Use</b>     | <b>Supplier</b>                     |
|----------------------------|------------------------|----------------|-------------------------------------|
| Anti-human CD24            | SN3 (conjugated)       | FACS           | Novus Bio, Thermo Fisher Scientific |
|                            | SN3 (unconjugated)     | Treatment      | Novus Bio                           |
| Anti-human Siglec-10       | 5G6 (conjugated)       | FACS           | BioLegend                           |
|                            | 5G6 (unconjugated)     | Treatment      | BioLegend                           |
| Mouse IgG1 Isotype Control | MOPC-21 (conjugated)   | FACS           | BioLegend                           |
|                            | MOPC-21 (unconjugated) | Treatment      | BioXCell                            |
| Anti-human CD47            | B6H12                  | FACS           | BioLegend                           |
|                            | 5F9-G4                 | Treatment      | In house                            |
| Anti-human Fc              | HP6017                 | FACS           | BioLegend                           |
| Anti-human EGFR            | Cetuximab              | Treatment      | Bristol-Myers-Squibb                |
| Human IgG4 Isotype Control | ET904                  | Treatment      | Eureka Therapeutics                 |
| Human IgG1 Isotype Control | N/A (Cat #: BE0297)    | Treatment/FACS | BioXCell                            |
| Anti-human CD14            | M5E2                   | FACS           | BioLegend                           |
| Anti-human CD45            | HI30                   | FACS           | BioLegend                           |
| Anti-human/mouse CD11b     | M1/70                  | FACS           | BioLegend                           |
| Anti-mouse CD80            | 16-10A1                | FACS           | BioLegend                           |
| Anti-human EpCAM           | 9C4                    | FACS           | BioLegend                           |
| Anti-human CD56            | HCD56                  | FACS           | BioLegend                           |
| Anti-human CD3             | UCHT1                  | FACS           | BioLegend                           |
| Anti-human CD19            | SJ25C1                 | FACS           | BioLegend                           |
| Anti-human Siglec-5        | 1A5                    | FACS           | BioLegend                           |
| Anti-human Siglec-9        | K8                     | FACS           | BioLegend                           |
| Anti-mouse CD45            | 30-F11                 | FACS           | BioLegend                           |
| Anti-mouse F4/80           | BM8                    | FACS           | BioLegend                           |
| Anti-mouse CD24a           | M1/69                  | FACS           | BioLegend                           |
| Anti-mouse CSFR1           | AFS98                  | Treatment      | BioXCell                            |
